# Supplementary material for: Discovery of temporal and disease association patterns in condition-specific hospital utilization rates
Source: PLoS One. 2017 Mar 29;12(3):e0172049. doi: 10.1371/journal.pone.0172049 (PMC5371293; doi:10.1371/journal.pone.0172049)
Supplement: S1 Table — Clustering number, CCS code, and condition description are shown along with corresponding indices of temporal variation for seasonal coefficient, mean oscillation width, trend coefficient, and trend-linearity. (XLSX) [file pone.0172049.s003.xlsx]

## Sheet: Sheet1
CCS	Condition	Seasonal coefficient	Amplitude	Acrophase	Mean oscillation width	Trend coefficient	Trend linearity
1	Tuberculosis	0.191483	10.8667	6.44606	7	-0.0025979	0.787627
3	Bacterial infection; unspecified site	0.386736	115.94	4.09831	6	-5.58757e-05	0.0230229
4	Mycoses	0.140014	275.783	8.52427	6	0.00379179	0.766345
6	Hepatitis	0.0567733	13.7782	7.28815	8	0.00751183	0.92444
8	Other infections; including parasitic	0.281205	241.795	8.91299	5	0.0033492	0.308015
9	Sexually transmitted infections (not HIV or hepatitis)	0.0536877	16.9709	8.81226	5.75	0.00276686	0.796946
11	Cancer of head and neck	0.0617167	13.0531	6.29054	8	0.000344056	0.0148366
13	Cancer of stomach	0.0988221	16.1986	7.78177	7.5	0.00106788	0.391569
14	Cancer of colon	0.0651428	33.3667	7.29713	8.75	-0.00268848	0.798704
16	Cancer of liver and intrahepatic bile duct	0.0861368	14.8837	7.20462	7.25	0.00230088	0.905801
17	Cancer of pancreas	0.0693962	16.3414	6.99258	8	0.00103336	0.234837
19	Cancer of bronchus; lung	0.0565882	46.3563	7.02356	9	0.000673971	0.181023
22	Melanomas of skin	0.101725	2.84618	8.22795	7	-0.00797668	0.765971
23	Other non-epithelial cancer of skin	0.0979192	4.31048	9.26539	6	-7.66659e-05	0.503879
25	Cancer of uterus	0.0505121	12.4502	6.99759	7	-0.00193344	0.165867
26	Cancer of cervix	0.0632161	5.71842	8.2867	6	-0.00366056	0.787709
27	Cancer of ovary	0.0812184	11.5719	7.85397	7	0.00200899	0.652101
33	Cancer of kidney and renal pelvis	0.0487346	11.9918	12.7363	8.66667	0.000123781	0.0210987
38	Non-Hodgkin`s lymphoma	0.0949156	23.0783	7.13376	7.75	-0.000895487	0.289749
39	Leukemias	0.110501	26.778	7.15595	8	-1.4079e-05	0.00032732
45	Maintenance chemotherapy; radiotherapy	0.0468459	44.8403	6.94906	8	-0.00238924	0.862848
46	Benign neoplasm of uterus	0.0449788	58.9504	7.70846	5	-0.000810614	0.735682
50	Diabetes mellitus with complications	0.0501137	222.453	6.88125	8	-0.000138246	0.377626
51	Other endocrine disorders	0.0880321	49.6666	7.88822	6	0.00128655	0.0124362
53	Disorders of lipid metabolism	0.152286	4.2196	9.66649	7.33333	0.0501514	0.618377
54	Gout and other crystal arthropathies	0.108634	80.509	7.22289	5	0.00556407	0.993831
55	Fluid and electrolyte disorders	0.0808331	328.763	5.35334	8	0.000776244	0.000559884
58	Other nutritional; endocrine; and metabolic disorders	0.0484572	65.284	7.71727	6	0.000852545	0.363836
59	Deficiency and other anemia	0.0507546	87.8625	6.71677	6.25	0.00532803	0.929378
62	Coagulation and hemorrhagic disorders	0.0491819	20.1882	5.96282	6	0.000455375	0.58298
63	Diseases of white blood cells	0.0664686	26.9032	7.4165	8.25	0.00201098	0.846946
64	Other hematologic conditions	0.0997516	3.24816	7.71173	5	0.000879198	0.151557
651	Anxiety disorders	0.0656873	252.557	7.71907	6	0.00454692	0.819033
653	Delirium, dementia, and amnestic and other cognitive disorders	0.047002	56.8558	7.56303	8.5	0.00401773	0.959423
656	Impulse control disorders, NEC	0.0983558	31.2525	5.1197	5	0.00314889	0.59157
657	Mood disorders	0.0523284	485.802	6.28564	7	0.00368104	0.834914
658	Personality disorders	0.0637204	8.93281	6.68685	5	0.0130038	0.923115
659	Schizophrenia and other psychotic disorders	0.0856689	437.982	7.00937	8	0.00217857	0.454218
660	Alcohol-related disorders	0.0727074	782.039	7.53748	6	0.00894028	0.918229
661	Substance-related disorders	0.0701303	406.142	7.2695	6.75	0.00939601	0.653723
670	Miscellaneous disorders	0.0507451	37.2617	7.88318	6.5	0.00149367	0.41142
76	Meningitis (except that caused by tuberculosis or sexually transmitted disease)	0.319538	60.0133	9.38287	4.5	0.0046149	0.00012416
77	Encephalitis (except that caused by tuberculosis or sexually transmitted disease)	0.110798	5.5099	7.39321	8	0.00155649	0.0711142
78	Other CNS infection and poliomyelitis	0.109504	4.01743	7.19494	8.75	0.000862004	0.0403742
79	Parkinson`s disease	0.0431313	5.54507	8.55548	5	0.000518685	0.0457526
80	Multiple sclerosis	0.0909029	19.4153	6.16989	6.33333	0.00195498	0.180456
82	Paralysis	0.0740202	4.44584	8.0913	4.5	0.000440722	0.471947
83	Epilepsy; convulsions	0.0338861	192.182	6.84786	5.5	0.00126045	0.789482
84	Headache; including migraine	0.0586047	610.639	8.6645	6.5	0.00511908	0.98704
85	Coma; stupor; and brain damage	0.0490802	9.1555	7.96515	5	0.00459246	0.726197
86	Cataract	0.111402	3.37688	12.6935	4.25	0.00766355	0.194982
87	Retinal detachments; defects; vascular occlusion; and retinopathy	0.0616667	4.95646	7.644	6	0.00286923	0.129204
89	Blindness and vision defects	0.0649665	28.6692	8.04107	7	0.00456321	0.96471
90	Inflammation; infection of eye (except that caused by tuberculosis or sexually transmitteddisease)	0.164687	749.757	6.46283	4.5	0.0031904	0.456047
91	Other eye disorders	0.135131	258.06	8.08828	6	0.00332853	0.964063
92	Otitis media and related conditions	0.245692	1924.75	2.97607	6.66667	0.00083819	0.0865696
93	Conditions associated with dizziness or vertigo	0.10934	634.835	8.06492	6	0.00464026	0.962198
94	Other ear and sense organ disorders	0.199728	692.574	8.3435	4	0.00408471	0.936672
95	Other nervous system disorders	0.0626883	339.236	7.90441	6.25	0.00660617	0.992764
96	Heart valve disorders	0.0723816	49.9101	6.70392	8.5	0.0028168	0.856225
97	Peri-; endo-; and myocarditis; cardiomyopathy (except that caused by tuberculosis or sexually transmitted disease)	0.0606374	29.4887	6.0284	6.33333	0.000589983	0.188896
101	Coronary atherosclerosis and other heart disease	0.0524811	277.243	6.48011	6.5	-0.00618672	0.951107
105	Conduction disorders	0.0477932	24.1385	7.31213	7.25	-0.00229451	0.757
107	Cardiac arrest and ventricular fibrillation	0.0864841	67.7297	1.82221	4	-0.000146385	0.425101
108	Congestive heart failure; nonhypertensive	0.0676858	350.61	4.17645	4	-0.00258427	0.954795
111	Other and ill-defined cerebrovascular disease	0.0497331	9.54046	7.65893	7	0.00391143	0.949581
112	Transient cerebral ischemia	0.0693499	87.5832	7.65261	6.5	0.00026989	0.149886
114	Peripheral and visceral atherosclerosis	0.0569312	53.3647	7.03427	7.25	0.000807224	0.494647
117	Other circulatory disease	0.0546109	63.0153	7.60453	6	0.00171708	0.923724
118	Phlebitis; thrombophlebitis and thromboembolism	0.0499464	63.9616	7.73504	6	0.00325605	0.977427
119	Varicose veins of lower extremity	0.194459	45.7099	8.09757	5	0.000214256	0.222055
120	Hemorrhoids	0.0375825	38.2707	7.9449	6	0.00399641	0.957706
121	Other diseases of veins and lymphatics	0.130277	50.3085	7.97937	6	0.00320347	0.949051
122	Pneumonia (except that caused by tuberculosis or sexually transmitted disease)	0.201511	1503.03	2.33667	7	0.000132102	0.0170576
124	Acute and chronic tonsillitis	0.116476	209.02	5.03813	7	-0.000360915	0.150442
125	Acute bronchitis	0.431008	2300.51	2.16667	7	-0.00129507	0.0768797
126	Other upper respiratory infections	0.225641	5996.02	2.84142	7	-0.000646894	0.00569545
127	Chronic obstructive pulmonary disease and bronchiectasis	0.159465	1046.26	2.62789	7	-5.1327e-05	0.216765
129	Aspiration pneumonitis; food/vomitus	0.0888512	65.0521	4.60618	4.66667	-0.000755647	0.704793
131	Respiratory failure; insufficiency; arrest (adult)	0.0720162	97.7514	4.69716	5	-0.00557702	0.734914
132	Lung disease due to external agents	0.0942305	5.00992	1.27242	6.33333	0.0214909	0.301204
133	Other lower respiratory disease	0.0959804	957.219	2.19753	8	0.00334218	0.80052
134	Other upper respiratory disease	0.166144	805.463	4.70696	4.5	0.00258983	0.714511
135	Intestinal infection	0.222233	575.453	3.2389	5	0.00194354	0.0140083
136	Disorders of teeth and jaw	0.0346707	282.255	8.84545	6.5	0.00324465	0.986921
137	Diseases of mouth; excluding dental	0.0480054	46.7883	7.50086	4.75	0.00122538	0.754659
139	Gastroduodenal ulcer (except hemorrhage)	0.0675789	20.1089	7.52586	6	0.000763848	0.543581
140	Gastritis and duodenitis	0.0690877	264.754	3.41696	5	-0.000167071	0.0118982
142	Appendicitis and other appendiceal conditions	0.0892903	168.63	8.0382	6.5	0.0012964	0.348319
143	Abdominal hernia	0.0456554	84.9286	7.53102	7.5	0.00251393	0.697983
144	Regional enteritis and ulcerative colitis	0.0632008	45.9746	7.57712	6.25	0.00343347	0.977733
146	Diverticulosis and diverticulitis	0.0969774	219.9	8.15779	7	0.00201283	0.989225
148	Peritonitis and intestinal abscess	0.0639853	7.92485	7.84281	7	0.00398662	0.929579
149	Biliary tract disease	0.0530231	171.018	8.00176	7	0.00291964	0.892589
152	Pancreatic disorders (not diabetes)	0.0755214	103.258	7.87929	7	0.00365334	0.978683
154	Noninfectious gastroenteritis	0.347091	2455.82	3.15365	5	-0.00192353	0.629812
155	Other gastrointestinal disorders	0.0273767	200.809	5.10117	7.25	0.0056418	0.971239
157	Acute and unspecified renal failure	0.0758166	142.365	6.77518	7	0.00251565	0.694391
158	Chronic kidney disease	0.0857008	25.2425	6.98746	5.5	-0.00141255	0.236387
159	Urinary tract infections	0.122043	1432.82	8.84329	5	0.00399251	0.975692
160	Calculus of urinary tract	0.104379	530.283	8.49566	5	0.00243985	0.925677
161	Other diseases of kidney and ureters	0.0533974	20.5291	8.61948	5.25	0.00245345	0.867245
163	Genitourinary symptoms and ill-defined conditions	0.0604319	215.481	8.76463	5.75	0.00496739	0.988966
165	Inflammatory conditions of male genital organs	0.0659736	57.2733	8.90683	5	0.00462808	0.825328
167	Nonmalignant breast conditions	0.0458003	40.2403	9.01254	5	0.00440877	0.980329
168	Inflammatory diseases of female pelvic organs	0.0706149	141.765	9.38295	5	0.00424333	0.972198
169	Endometriosis	0.0548272	10.6159	6.79442	7	-0.00226614	0.813485
171	Menstrual disorders	0.0518125	97.4539	8.8132	5.5	0.000721446	0.472935
172	Ovarian cyst	0.0478523	65.3513	8.85001	5	0.00581232	0.95294
175	Other female genital disorders	0.0441108	135.635	8.93457	5.5	0.00373769	0.926096
180	Ectopic pregnancy	0.0632048	19.0615	5.91137	6.5	0.00737522	0.795556
184	Early or threatened labor	0.0563886	140.099	8.22782	5	-0.00038782	0.346111
185	Prolonged pregnancy	0.069655	126.946	8.81156	5	0.00536243	0.954612
186	Diabetes or abnormal glucose tolerance complicating pregnancy; childbirth; or the puerperium	0.0654257	34.6797	8.55659	7	0.00115949	0.273174
187	Malposition; malpresentation	0.0589734	43.7926	8.19551	7	-0.00265969	0.954366
188	Fetopelvic disproportion; obstruction	0.0924459	19.6833	7.99987	6.5	-0.00215701	0.580434
190	Fetal distress and abnormal forces of labor	0.0610242	67.0618	8.09896	6.5	-0.00176992	0.746355
191	Polyhydramnios and other problems of amniotic cavity	0.0424448	60.8454	8.11439	7	0.00356955	0.967346
192	Umbilical cord complication	0.0713227	50.7639	8.34219	6.25	-0.00153485	0.452684
193	OB-related trauma to perineum and vulva	0.0529428	159.178	8.30448	6.75	-0.00600607	0.953224
195	Other complications of birth; puerperium affecting management of mother	0.0566813	228.02	8.07227	6	0.00048371	0.218623
197	Skin and subcutaneous tissue infections	0.204026	2655.13	8.70367	6	0.00433677	0.970973
198	Other inflammatory condition of skin	0.121038	106.231	7.971	6	0.00270343	0.690846
199	Chronic ulcer of skin	0.0868224	50.5397	8.47629	5	0.000909306	0.11377
200	Other skin disorders	0.180099	913.17	8.25568	5	0.00301349	0.682771
201	Infective arthritis and osteomyelitis (except that caused by tuberculosis or sexually transmitted disease)	0.0832847	31.2786	7.73926	7	0.000773552	0.304549
202	Rheumatoid arthritis and related disease	0.0772708	14.9841	7.64721	6	0.000212354	0.00350622
204	Other non-traumatic joint disorders	0.0875971	715.555	7.90131	7	0.00694387	0.951368
205	Spondylosis; intervertebral disc disorders; other back problems	0.0473465	848.657	8.51957	6.5	0.00541934	0.984789
209	Other acquired deformities	0.0405495	12.6988	7.60627	6.5	0.00226867	0.922795
210	Systemic lupus erythematosus and connective tissue disorders	0.062444	11.3635	7.69023	6	0.00188819	7.09184e-05
211	Other connective tissue disease	0.118244	1308.87	7.99181	6	0.00343091	0.980904
213	Cardiac and circulatory congenital anomalies	0.0983637	28.9845	6.98032	6.5	-0.00128226	0.573502
214	Digestive congenital anomalies	0.0528765	6.10503	8.01958	7.25	-3.67881e-05	0.183011
215	Genitourinary congenital anomalies	0.0513871	5.01559	8.25628	6.5	-0.00253032	0.26644
217	Other congenital anomalies	0.094903	27.6484	7.52143	6	0.000411911	0.131176
219	Short gestation; low birth weight; and fetal growth retardation	0.234553	6.93397	8.17952	5.75	-0.00382218	0.101661
221	Respiratory distress syndrome	0.197232	5.14857	6.94569	7.66667	-0.00465655	0.849936
224	Other perinatal conditions	0.0533194	40.134	10.134	6.25	0.00654335	0.885008
225	Joint disorders and dislocations; trauma-related	0.0792419	190.555	8.69073	6	0.000528329	0.125646
227	Spinal cord injury	0.18953	12.3234	8.79425	5	-0.00143687	0.83164
228	Skull and face fractures	0.146822	235.866	8.06918	7	0.00174571	0.662602
229	Fracture of upper limb	0.142027	1161.92	8.2229	6	-0.00114732	0.881432
230	Fracture of lower limb	0.108849	528.332	8.23033	5	-0.000436469	0.469801
231	Other fractures	0.0564932	118.09	9.20382	5	0.00261573	0.739915
232	Sprains and strains	0.0888911	2240.45	7.95858	7	7.75592e-05	0.200706
233	Intracranial injury	0.0717392	196.643	9.03364	6	0.00553746	0.720656
234	Crushing injury or internal injury	0.168926	151.235	8.34642	6.5	0.00132038	0.677227
235	Open wounds of head; neck; and trunk	0.140271	1697.81	8.29008	6	-0.0012519	0.939017
236	Open wounds of extremities	0.28619	4233.26	8.23721	5	-0.00150593	0.704495
237	Complication of device; implant or graft	0.0686735	260.686	8.32522	7	0.000763309	0.796928
238	Complications of surgical procedures or medical care	0.0900425	358.397	7.90452	7	0.00163991	0.694367
239	Superficial injury; contusion	0.180615	4948.61	8.11658	6	0.000505795	0.0788504
240	Burns	0.165467	311.419	8.33517	5	0.00120092	0.0699477
241	Poisoning by psychotropic agents	0.0491389	28.5282	7.87028	6	0.00633045	0.963284
242	Poisoning by other medications and drugs	0.0446809	79.0322	7.81273	7	0.00120399	0.396974
243	Poisoning by nonmedicinal substances	0.654529	846.252	8.97229	5	-0.000320185	0.167556
244	Other injuries and conditions due to external causes	0.109541	1891.03	8.12862	6.25	0.00438689	0.959057
245	Syncope	0.0281899	170.847	7.47252	6.25	0.00120081	0.707791
247	Lymphadenitis	0.0461428	37.4852	3.19037	6	0.00391124	0.852327
248	Gangrene	0.133584	29.6361	5.46596	6	0.000113447	0.0355911
250	Nausea and vomiting	0.226794	1209.45	2.8967	5.33333	0.00505216	0.751757
252	Malaise and fatigue	0.140177	246.449	7.81105	6	0.00527971	0.971989
253	Allergic reactions	0.222964	1696.39	8.12617	5	0.00342489	0.801533
